# Supplementary material
Source: HighWire-hosted journal article supplement (http://www.annfammed.org/highwire/filestream/8519/field_highwire_adjunct_files/10/Goldman_Supp_App_6.pdf)
Supplement: Goldman_Supp_App_6.pdf [file Goldman_Supp_App_6.pdf]

**Goldman R, Parker DR, Brown J, Walker J, Eaton CB, Borkan JM. Recommendations for a Mixed Methods Approach for Evaluating the Patient-Centered Medical Home. Ann Fam Med. 2015;13:null-null.**

**Supplemental Appendix 6. Brown Medical Practice Waiting Room Observation Guide**

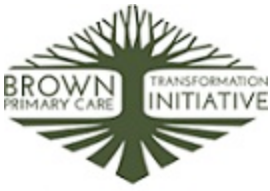

Site: \_\_\_\_\_ Date: \_\_\_\_\_ Start Time: \_\_\_\_\_ End Time: \_\_\_\_\_  
 Observer's Name: \_\_\_\_\_

**Brown Primary Care Transformation Initiative  
 Medical Practice Waiting Room Observation Field Notes Guide**

| Category                                                                                                                                                                 | Describe what you observation and hear | Note your thoughts and comments |
|--------------------------------------------------------------------------------------------------------------------------------------------------------------------------|----------------------------------------|---------------------------------|
| <b>Parking and entrance</b> (signage; accessibility; walking distance; stairs/ramps/elevators; etc.)                                                                     |                                        |                                 |
| <b>Physical setting</b> (layout; décor; emotional tone; condition of physical plant and furnishings; etc.)                                                               |                                        |                                 |
| <b>What's on the walls?</b> (decorations; mission; warnings; policies; health messages; patients' rights; language interpretation offerings; languages of signage; etc.) |                                        |                                 |
| <b>Waiting room resources</b> (e.g. educational TV; computer kiosk; types of magazines and brochures; Wi-Fi guest access; children's toys; etc.)                         |                                        |                                 |
| <b>Attention to diversity in décor and resources</b> (diversity in culture / ethnicity / race; gender; age; sexual orientation; etc.)                                    |                                        |                                 |
| <b>Language translation options and processes</b> (that are evident from waiting room observation)                                                                       |                                        |                                 |
| <b>Patients'/support people's behaviors in waiting room</b> (e.g. waiting on registration)                                                                               |                                        |                                 |

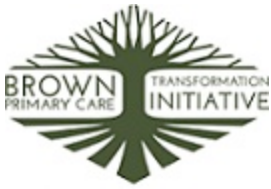

Site: \_\_\_\_\_ Date: \_\_\_\_\_ Start Time: \_\_\_\_\_ End Time: \_\_\_\_\_  
 Observer's Name: \_\_\_\_\_

|                                                                                                                                                                                                                                                                              |  |  |
|------------------------------------------------------------------------------------------------------------------------------------------------------------------------------------------------------------------------------------------------------------------------------|--|--|
| <p>line; talking; reading; watching TV; watching other pts; using electronics; where pts choose to sit; etc. Include observations of emotional expression through behaviors, e.g. pacing, anxious glances, relaxed demeanor, angry speech, nature of interactions, etc.)</p> |  |  |
| <p><b>Waiting room feel</b><br/>         (e.g. relaxed, anxious, crowded, noisy, cold, welcoming, etc., and why.)</p>                                                                                                                                                        |  |  |
| <p><b>Tone of front office staff</b> (e.g. friendly, perfunctory, harried, respectful, etc. Note examples.)</p>                                                                                                                                                              |  |  |
| <p><b>Registration / check-in</b> (location; process; maintenance of confidentiality; flow of required form completion, standing on line, etc.)</p>                                                                                                                          |  |  |
| <p><b>What can you hear/note from waiting room chairs?</b> (personal check-in info / PHI; reason for visit; staff telephone talk; intra-staff talk; comments to patients; attitudes toward patients, etc.)</p>                                                               |  |  |
| <p><b>What can you see from waiting room chairs?</b> (paperwork / PHI; staff telephone behavior; attitude toward patients; procedures such as weight/height checks; etc.)</p>                                                                                                |  |  |
| <p><b>What information is collected at</b></p>                                                                                                                                                                                                                               |  |  |

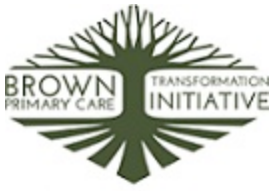

Site: \_\_\_\_\_ Date: \_\_\_\_\_ Start Time: \_\_\_\_\_ End Time: \_\_\_\_\_  
Observer's Name: \_\_\_\_\_

|                  |  |  |
|------------------|--|--|
| <b>check-in?</b> |  |  |
|------------------|--|--|



Site: \_\_\_\_\_ Date: \_\_\_\_\_ Start Time: \_\_\_\_\_ End Time: \_\_\_\_\_  
 Observer's Name: \_\_\_\_\_

|                                                                                                                           |  |  |
|---------------------------------------------------------------------------------------------------------------------------|--|--|
| <b>How long does check-in take?</b><br>(note apparent reasons)                                                            |  |  |
| <b>What information is collected in waiting room?</b><br>(health screening surveys, etc.)                                 |  |  |
| <b>Manner and tone when calling patient into exam room</b>                                                                |  |  |
| <b>Time from check-in until patients are called to exam room</b>                                                          |  |  |
| <b>Check-out location/process</b><br>(include examples of efficiency/inefficiency; time; impact on confidentiality; etc.) |  |  |
| <b>Time from check-in to check-out</b>                                                                                    |  |  |
| <b>Problems observed and staff problem-solving techniques</b>                                                             |  |  |
| <b>Note anything related to past, current, future changes in practice</b>                                                 |  |  |
| <b>Describe evidence of teamwork (or lack of teamwork)</b>                                                                |  |  |
| <b>Number and characteristics of patients entering and exiting within an hour</b>                                         |  |  |



Site: \_\_\_\_\_ Date: \_\_\_\_\_ Start Time: \_\_\_\_\_ End Time: \_\_\_\_\_  
Observer's Name: \_\_\_\_\_

\_\_\_\_\_

|                                                                                                                                   |  |
|-----------------------------------------------------------------------------------------------------------------------------------|--|
| <p><b>Stories</b> (What do you hear that might be of use to understanding this practice and its capacity for transformation?)</p> |  |
| <p><b>Insights</b> (What stands out for you from what you observed today, and why?)</p>                                           |  |

**Note: Similar observation templates can be developed for each practice to address other areas of the site, including exam rooms, nursing stations, storage areas, meeting spaces, parking lot, lab, etc.**
